# Supplementary material for: Spinal cord injury: can we repair spinal cord non-invasively by using magnetic stimulation?
Source: PubMed Central journal article supplement — Neural Regen Res. 2021 Apr 23;16(12):2429–30. doi: 10.4103/1673-5374.313033 (PMC8374589; doi:10.4103/1673-5374.313033), 2021-04-23
Supplement: NRR-16-2429_Suppl1.pdf [file NRR-16-2429_Suppl1.pdf]

## OPEN PEER REVIEW REPORT 1

**Name of journal:** Neural Regeneration Research

**Manuscript NO:** NRR-D-20-00917

**Title:** Spinal cord injury: Can we repair spinal cord non-invasively by using magnetic stimulation?

**Reviewer's Name:** Sachchida Nand Nand Rai

**Reviewer's country:** India

### COMMENTS TO AUTHORS

The role of magnetic stimulation is nicely covered in spinal cord injury in this manuscript. However, very few parameters are studied in this manuscript.

I have some comments on this manuscript:

1. Complete editorial checking will be required to correct the grammatical and punctuation mistakes.
2. Kindly provide your detailed mechanism of action behind magnetic stimulation.
3. Kindly shows the 'pyramidal tract waves after magnetic stimulation.
4. What is the effect of effect of stimulus intensity in your findings?
5. Kindly shows the stimulus-response curve.
