# Supplementary material for: Spinal cord injury: can we repair spinal cord non-invasively by using magnetic stimulation?
Source: PubMed Central journal article supplement — Neural Regen Res. 2021 Apr 23;16(12):2429–30. doi: 10.4103/1673-5374.313033 (PMC8374589; doi:10.4103/1673-5374.313033), 2021-04-23
Supplement: NRR-16-2429_Suppl2.pdf [file NRR-16-2429_Suppl2.pdf]

## OPEN PEER REVIEW REPORT 2

**Name of journal:** Neural Regeneration Research

**Manuscript NO:** NRR-D-20-00917

**Title:** Spinal cord injury: Can we repair spinal cord non-invasively by using magnetic stimulation?

**Reviewer's Name:** Shalaka Mulherkar

**Reviewer's country:** USA

### COMMENTS TO AUTHORS

In the manuscript entitled 'Spinal cord injury: Can we repair spinal cord non-invasively by using magnetic stimulation', the authors have summarized their previous work briefly and clearly. The authors have used RMS to successfully stimulate axonal regrowth, decrease fibrotic scar and increase glial scar in a non-invasive manner. Most importantly, this could also be achieved 10 days after the traumatic injury in mice. They have also shown that the rTSMS upregulates proteins involved in axonal growth and cell proliferation. Further, they have discussed the drawbacks of their experimental paradigm and offered their perspective on the issues. Overall the authors have made a credible effort in arguing for repetitive magnetic stimulation to be considered as a therapeutic approach to treat human patients after SCI.
